# Supplementary material
Source: PubMed Central journal article supplement (PMC3771397)
Supplement: NIHMS487834-supplement-1.pdf [file NIHMS487834-supplement-1.pdf]

**ONLINE SUPPLEMENT**

**HO-1 Induction Improves Type-1 Cardiorenal Syndrome in Mice with Impaired**

**Ang II-induced Lymphocyte Activation (SCID Mice)**

Sumit R. Monu<sup>1,4</sup>, Paola Pesce<sup>1,2</sup>, Komal Sodhi<sup>1,4</sup>, Massimo Boldrin<sup>1,3</sup>,

Nitin Puri<sup>4</sup>, Larisa Fedorova<sup>4</sup>, David Sacerdoti<sup>2</sup>, Stephen J. Peterson<sup>5</sup>,

Nader G. Abraham<sup>1</sup> and Attallah Kappas<sup>6</sup>

<sup>1</sup>Department of Medicine, Joan C. Edwards School of Medicine, Marshall University, Huntington,  
WV, 25755, USA

<sup>2</sup>Department of Medicine, <sup>3</sup>CORIT-Consortium for Research in Organ Transplantation,  
University of Padova, 35100 Padova, Italy

<sup>4</sup>Department of Physiology & Pharmacology,

University of Toledo College of Medicine, Toledo, OH, 43614, USA

<sup>5</sup>Department of Medicine, New York Medical College, Valhalla, NY, 10595, USA

<sup>6</sup>The Rockefeller University, New York, NY, 10065, USA

Running Title: T-lymphocyte and HO-1 in cardiorenal syndrome

Corresponding author: Nader G. Abraham, PhD., Dr. H.C., FAHA, Professor,

Marshall University Joan Edwards School of Medicine, Huntington, West Virginia, 25701-3655,

FAX: 304 691-1726, Tel 304-691-1791, E-mail: abrahamn@marshall.edu

## RESULTS

## Plasma Renin and Angiotensin II levels:

Figure S

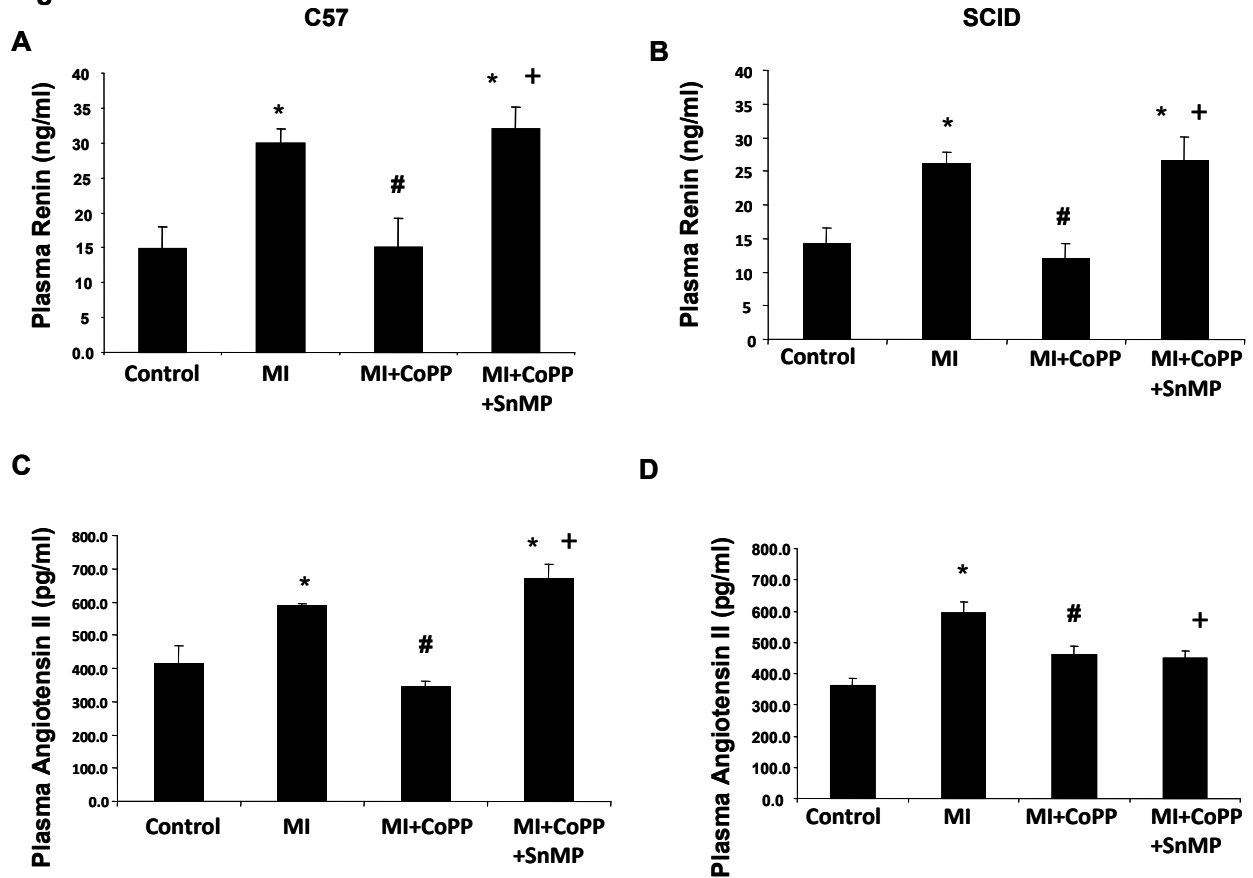

**Figure S1.** Effect of CoPP in C57 and SCID mice on plasma Renin and Angiotensin II levels 30 days post MI. **(A, B)** Plasma Renin level (ng/ml) \* $p < 0.05$  vs. Control, # $p < 0.05$  vs. MI, + $p < 0.05$  vs. MI+CoPP; **(C, D)** Plasma Angiotensin II level (pg/ml) of C57 and SCID mice respectively; \* $p < 0.05$  vs. Control, # $p < 0.05$  vs. MI, + $p < 0.05$  vs. MI+CoPP.
